# Supplementary material for: 3D hollow-out TiO2 nanowire cluster/GOx as an ultrasensitive photoelectrochemical glucose biosensor
Source: Royal Society of Chemistry journal article supplement (doi:10.1039/d0tb00082e), 2020-01-01
Supplement: d0tb00082e1.pdf [file d0tb00082e1.pdf]

## Supporting Information

### **3D hollow-out TiO<sub>2</sub> nanowire cluster / GOx as ultrasensitive photoelectrochemical glucose biosensor**

Wenke Yang,<sup>a</sup> Xiaohong Wang,<sup>a</sup> Wanjun Hao,<sup>\*a</sup> Qiang Wu,<sup>\*b</sup> Juan Peng,<sup>c</sup>

Jinchun Tu,<sup>a</sup> and Yang Cao,<sup>a,d</sup>

<sup>a</sup> *State Key Laboratory of Marine Resource Utilization in South China Sea, College of Material Science and Engineering, Hainan University, Haikou 570228, China.*

<sup>b</sup> *School of Tropical Medicine and Laboratory Medicine, Key Laboratory of Emergency and Trauma of Ministry of Education, Hainan Medical University, Haikou 571199, China.*

<sup>c</sup> *State Key Laboratory of High-Efficiency Utilization of Coal and Green Chemical Engineering, School of Chemistry and Chemical Engineering, Ningxia University, Yinchuan 750021, China.*

<sup>d</sup> *Qiongtai Normal University, Haikou 571127, China.*

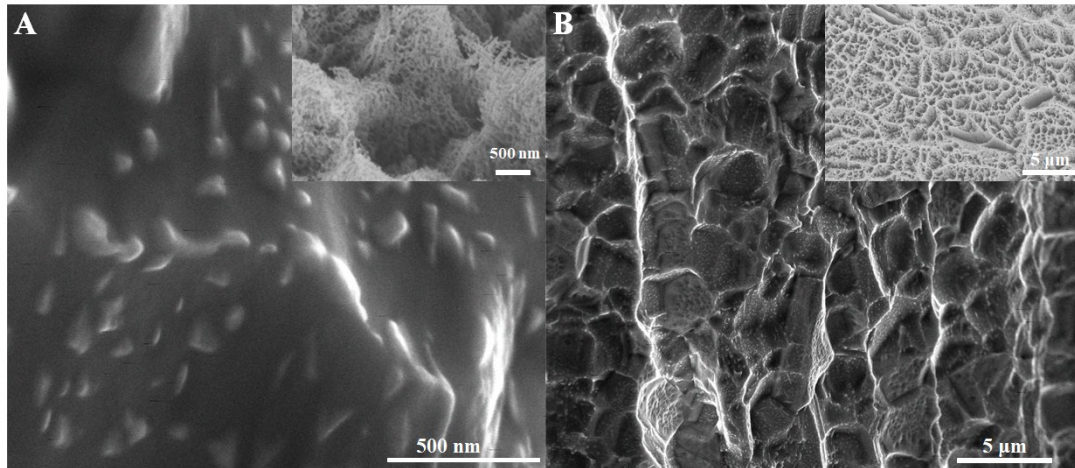

Fig. S1. SEM images (A) and (B) of initial Ti wire mesh at different magnifications. The inset shows the SEM image of the Ti wire mesh after anodization.

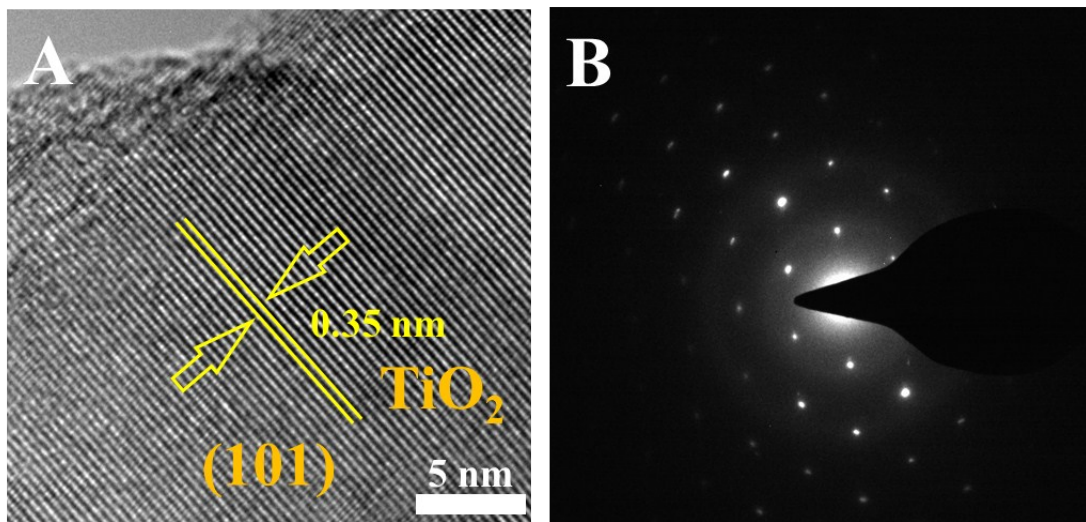

Fig. S2. (A) HR-TEM images of 3D hollow-out TiO<sub>2</sub> NWc of high magnification. (B) SAED pattern of 3D hollow-out TiO<sub>2</sub> NWc.

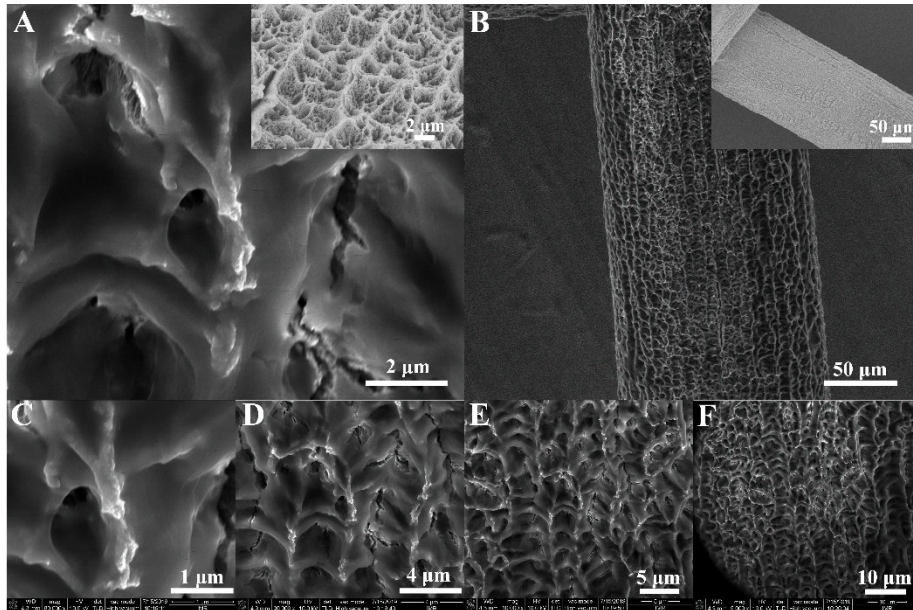

Fig. S3. Partially magnified (A) and complete wire (B) SEM images of 3D hollow-out  $\text{TiO}_2$  nanowire cluster loaded with glucose oxidase. SEM images (C, D, E, and F) at different magnifications of 3D hollow-out  $\text{TiO}_2$  nanowire cluster after glucose oxidase loading.

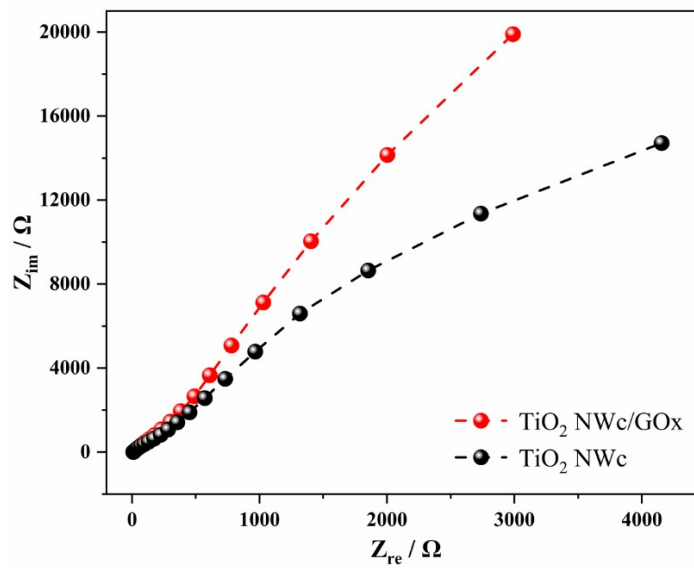

Fig. S4. EIS measurement of  $\text{TiO}_2$  NWc before and after GOx loading in 0.1 M PBS (PH=7.4).

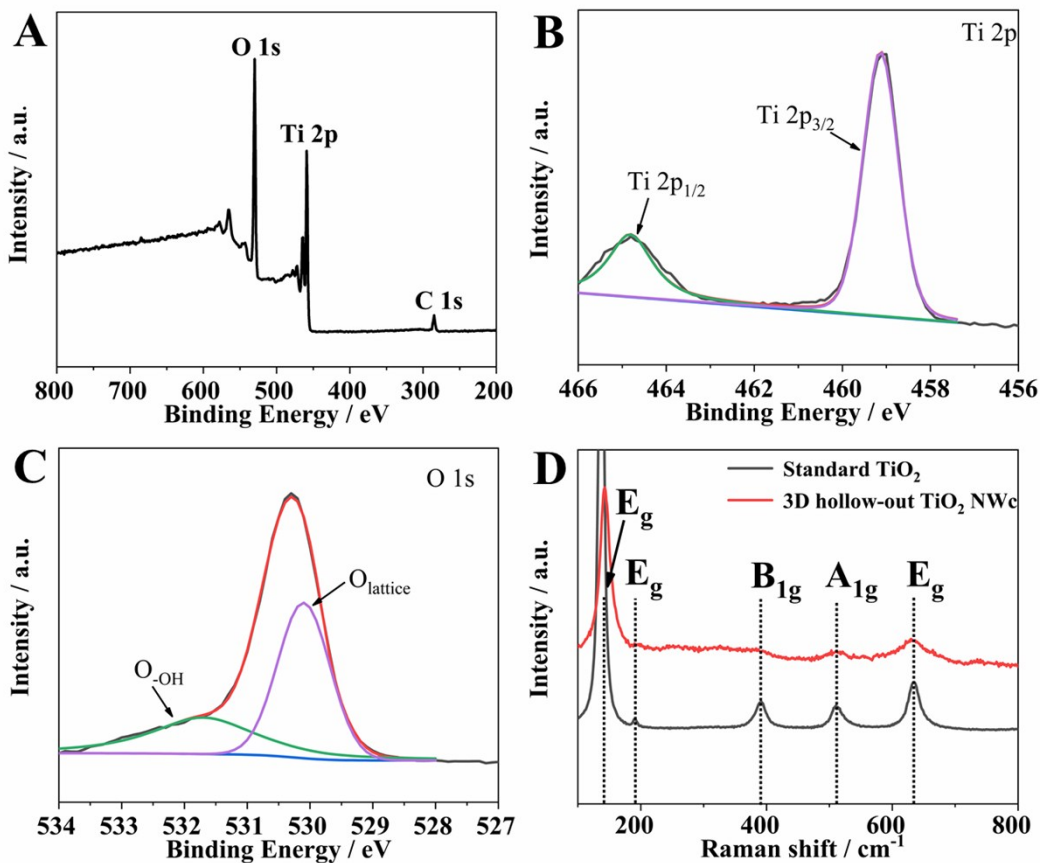

Fig. S5. (A) Wide scan and high-resolution XPS spectra of (B) Ti 2p and (C) O 1s. (D) Raman spectra of 3D hollow-out TiO<sub>2</sub> NWc.

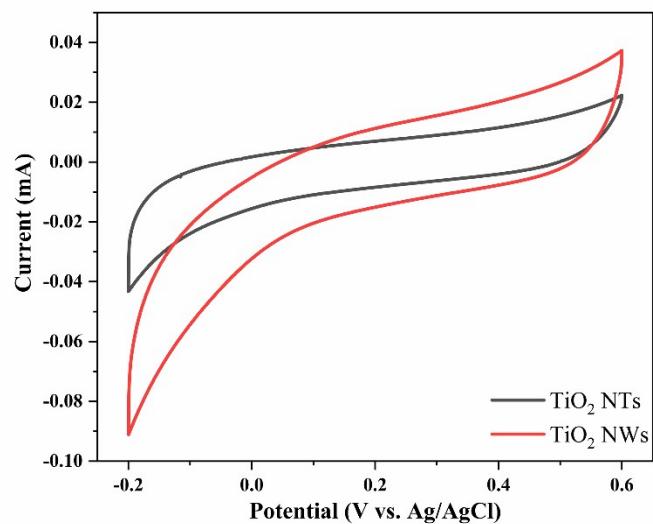

Fig. S6. CV curves for TiO<sub>2</sub> NWc and TiO<sub>2</sub> NTs recorded in 1.0 M PBS (PH=7) at scan rate of 50 mV s<sup>-1</sup>.

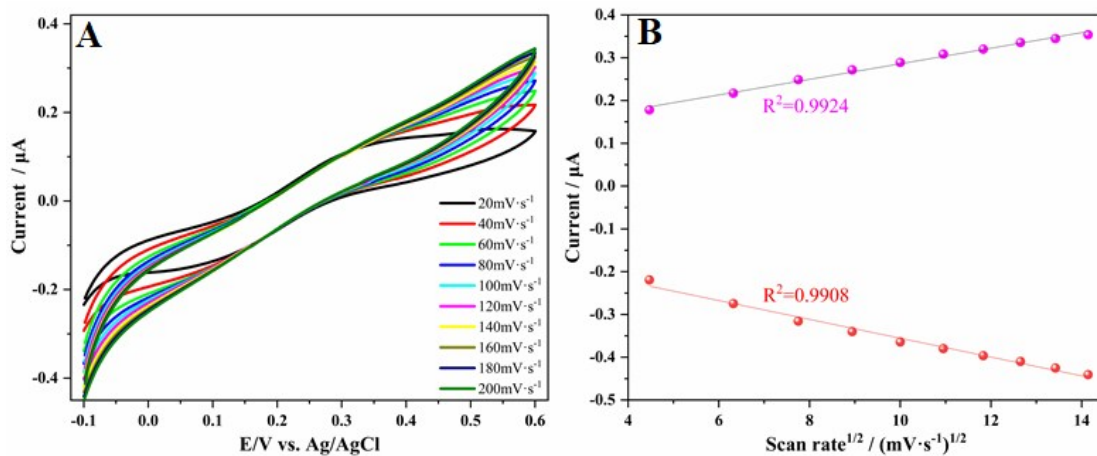

Fig. S7. (A) CV of 3D hollow-out  $\text{TiO}_2$  NWc electrode at different scan rates (from  $20 \text{ mV}\cdot\text{s}^{-1}$  to  $200 \text{ mV}\cdot\text{s}^{-1}$ ) in a solution containing  $10 \text{ mM}$  of  $\text{Fe}(\text{CN})_6^{3-/4-}$  ( $0.1 \text{ M}$  KCl). (B) Plots of current versus scan rate<sup>1/2</sup>.

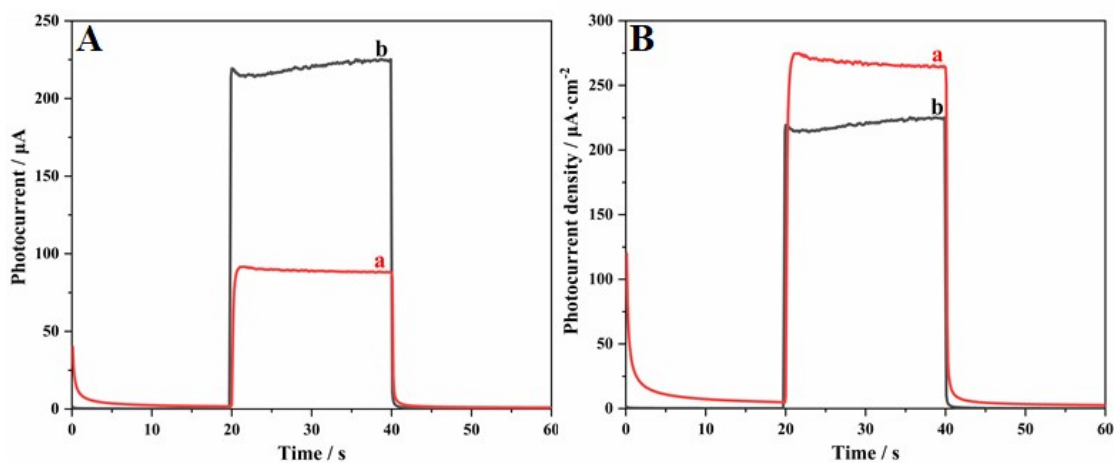

Fig. S8. amperometric *i-t* curve (A) and time–current density curves (B) of 3D hollow-out  $\text{TiO}_2$  NWc (curve a) and  $\text{TiO}_2$  NTs (curve b).

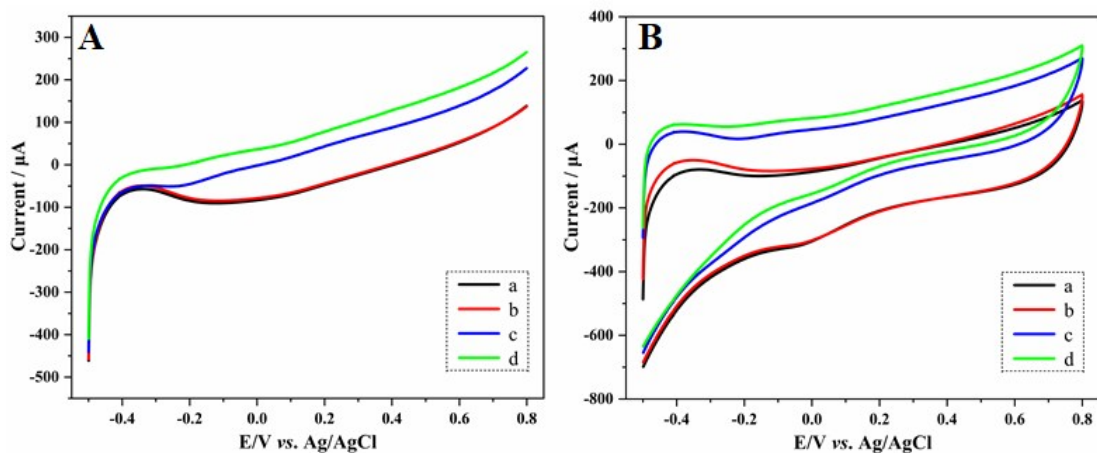

Fig. S9. (A) Linear sweep voltammogram. (B) The CV of the 3D hollow-out  $\text{TiO}_2$  NWc

electrode in the (a, c) absence and (b, d) presence of 2 mM glucose under (a, b) lights off and (c, d) on conditions.

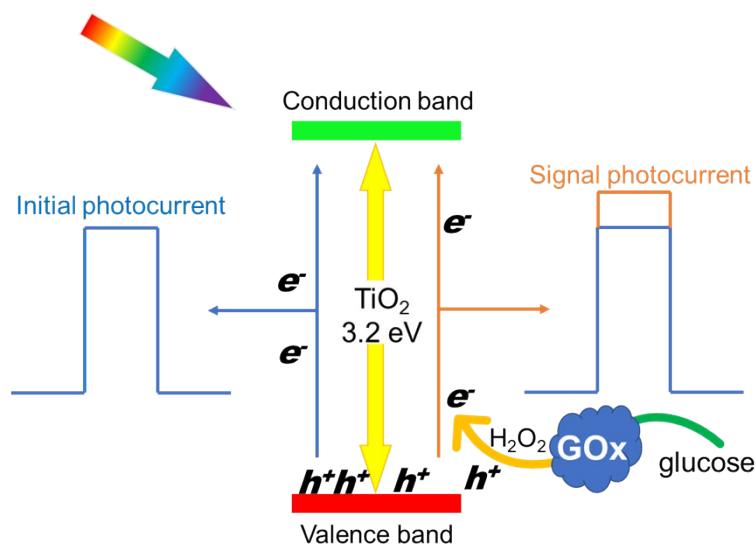

Fig. S10. The mechanism of the photoelectrochemical biosensor.

As shown in Fig. S10, after anatase  $\text{TiO}_2$  is irradiated with simulated sunlight, the electrons ( $e^-$ ) in the valence band absorb the energy of photons and then transition to the conduction band, which forms the initial photocurrent. At the same time, an oxidizing photo-generated hole ( $h^+$ ) is left in the original position of the electron. In the presence of glucose in the electrolyte, GOx located on the surface of  $\text{TiO}_2$  gradually consumes glucose through an enzymatic reaction, thereby generating the active substance  $\text{H}_2\text{O}_2$ . At this time, the photogenerated holes in  $\text{TiO}_2$  will capture the enzymatic products to carry out the redox reaction and generate a signal photocurrent. Different glucose concentrations produce variable electrical signals, which convert biological signals into electrical signals.

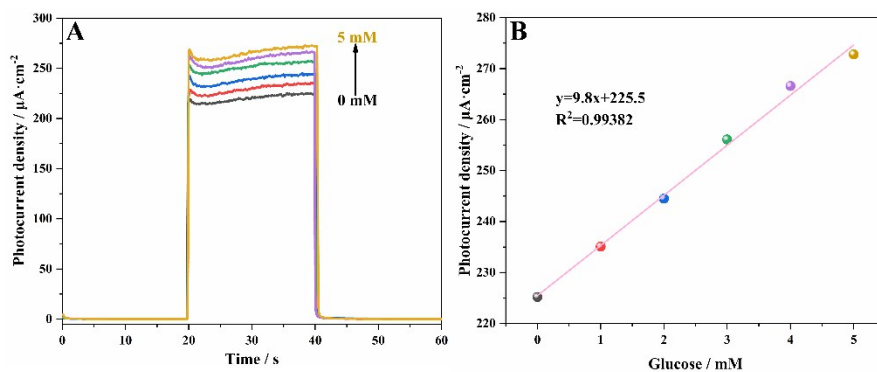

Fig. S11. *i*-*t* responses (A) of TiO<sub>2</sub> NTs/GOx toward Glu at increasing concentrations from 0 mM to 5 mM in electrolyte of 0.1 M PBS (pH 7.4). Linear (B) calibration ([Glu] vs. photocurrent density) curves of TiO<sub>2</sub> NTs/GOx biosensor.
